# Supplementary material
Source: publisher figshare collection journal article supplement (https://tandf.figshare.com/articles/dataset/_/8273765)
Supplement: Supplementary file 5 [file 1]

Archive with 4 entries (4 files):
- 2019_04_02_Suppl_Fig._1_rev2_Sghaier_et_al_Free_Rad_Res.pdf
- 2019_04_02_Suppl_Fig._2_rev2_Sghaier_et_al_Free_Rad_Res.pdf
- 2019_04_02_Suppl_Fig._3_rev2_Sghaier_et_al_Free_Rad_Res.pdf
- 2019_04_02_Suppl_Fig._4_rev2_Sghaier_et_al_Free_Rad_Res.pdf
