# Supplementary material
Source: publisher figshare collection journal article supplement (https://tandf.figshare.com/articles/dataset/_/8273765)

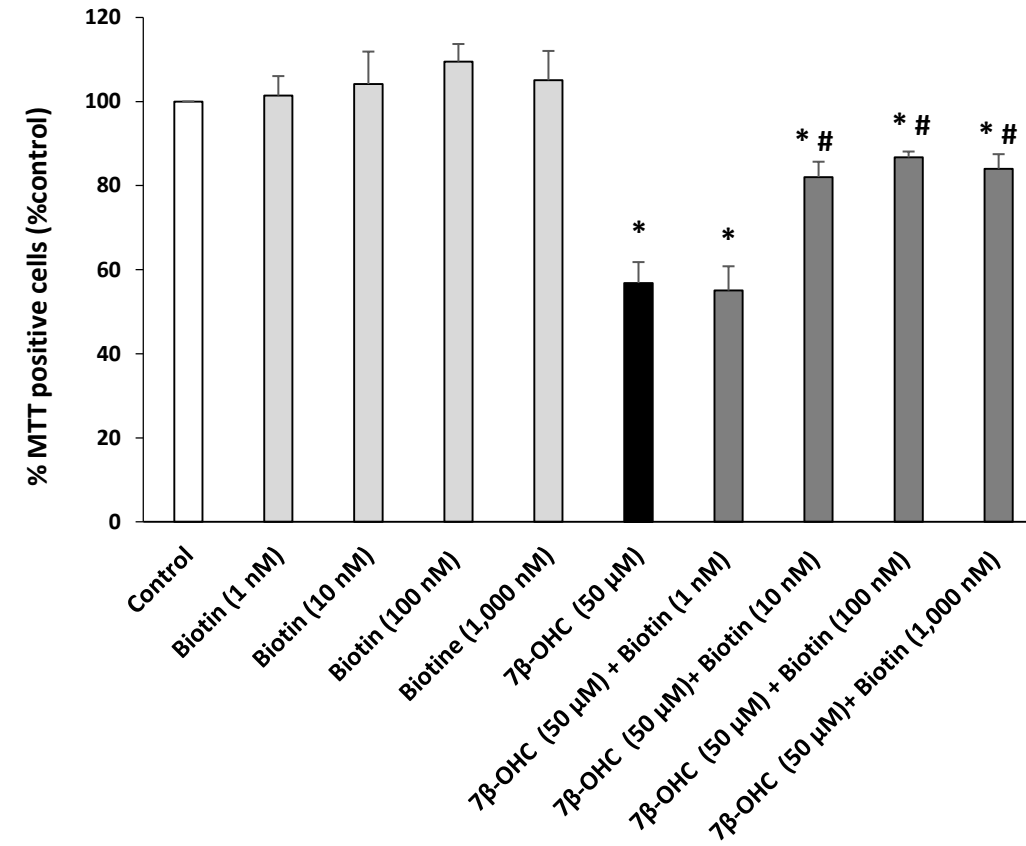

Supplementary Fig. 2; Sghaier R et al

Supplement: Supplementary file 1 [file 1]

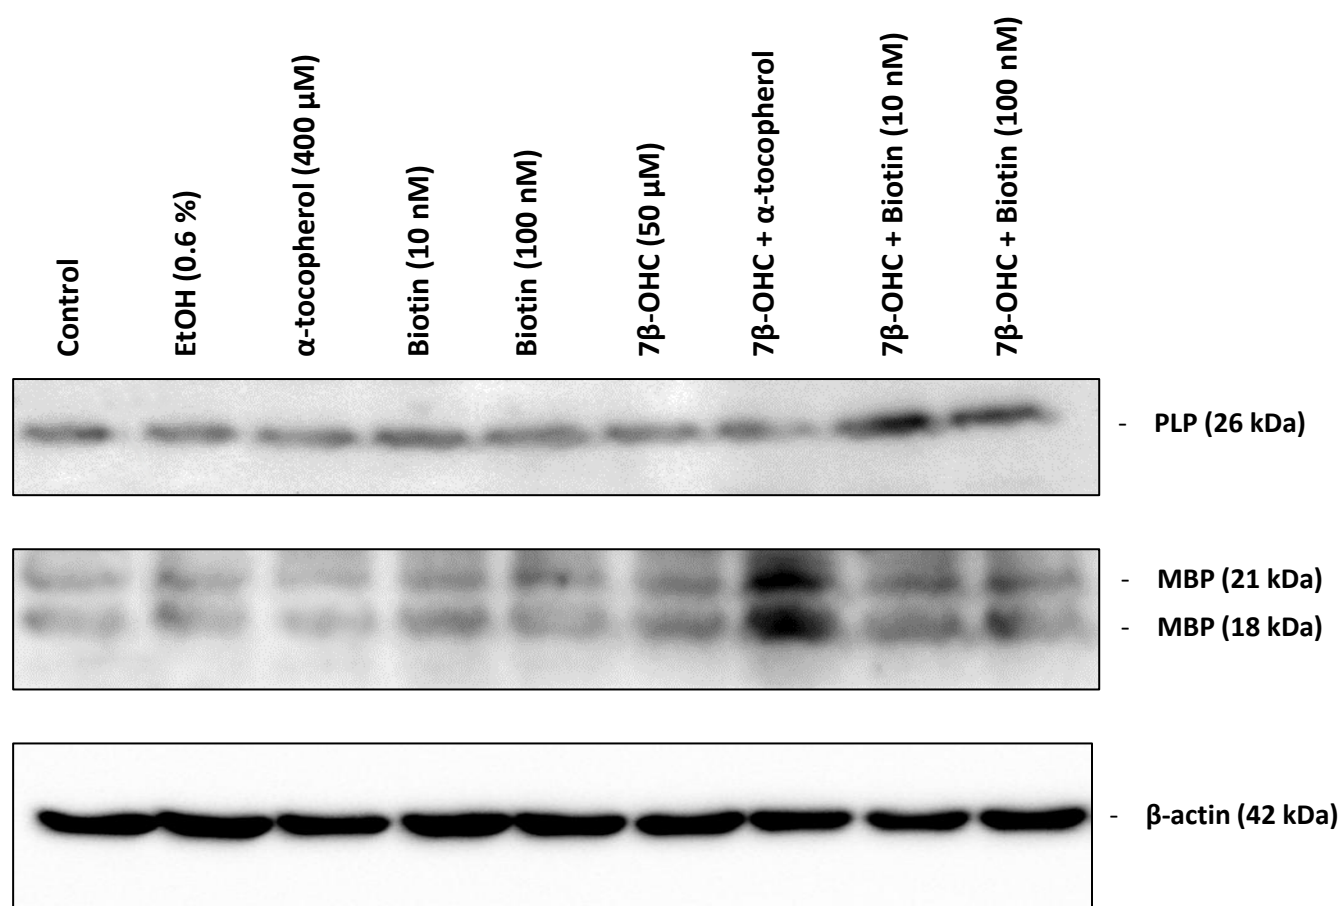

Supplement: Supplementary file 2 [file 1]

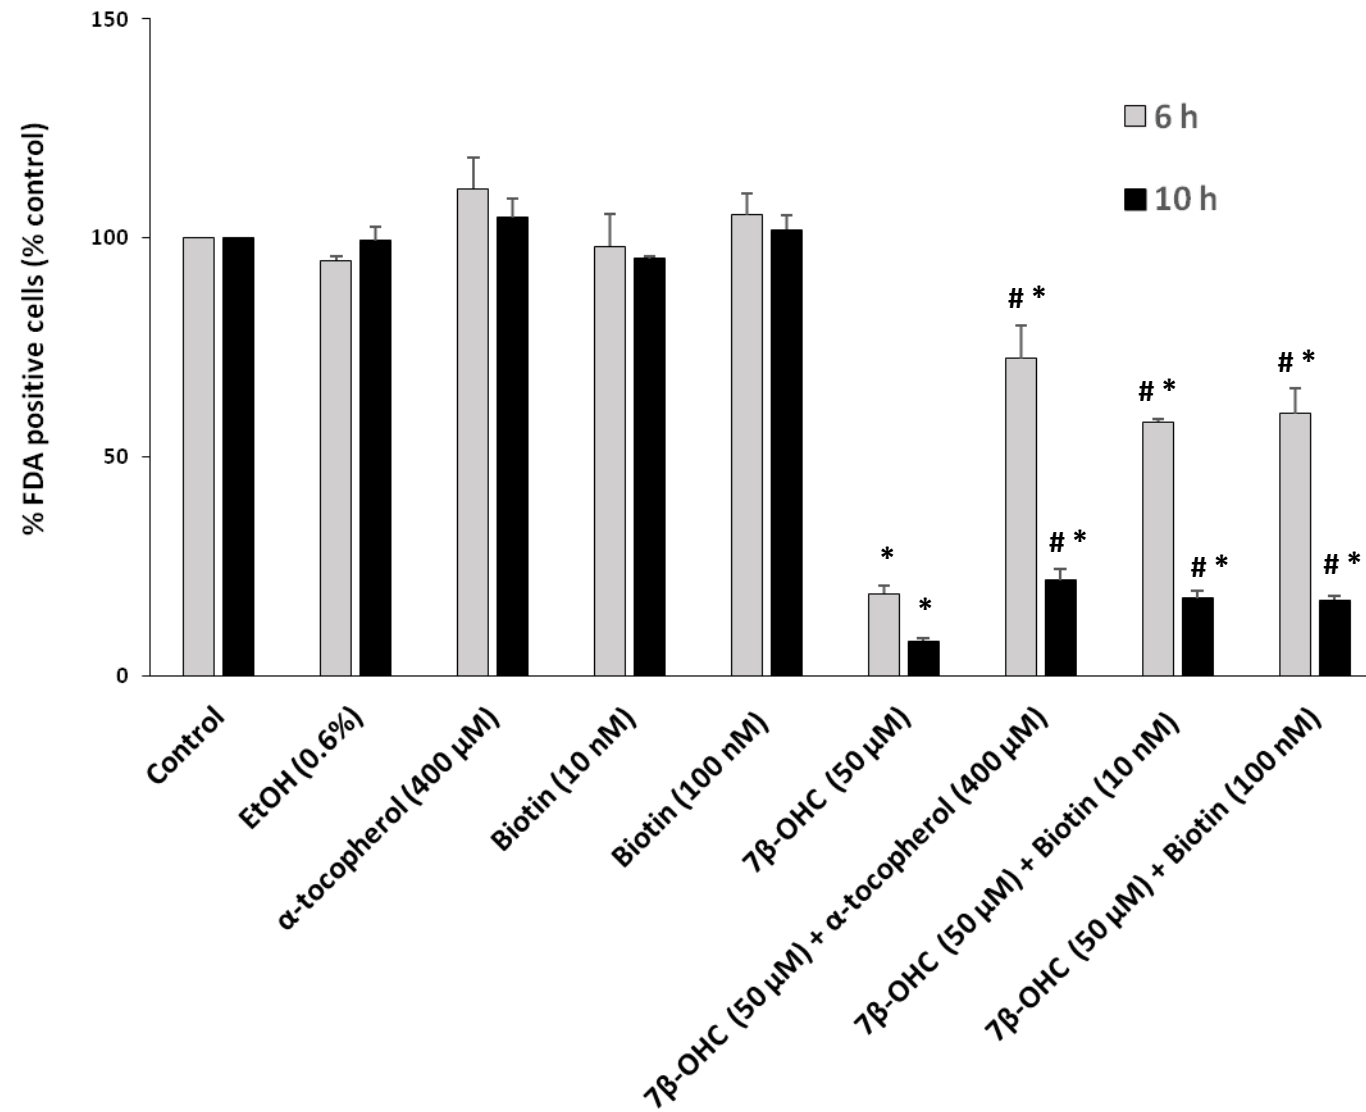

Supplementary Fig. 4; Sghaier R et al

Supplement: Supplementary file 3 [file 1]
